# Supplementary material for: Cervical transcutaneous spinal stimulation for spinal motor mapping
Source: PubMed Central journal article supplement — iScience. 2022 Aug 31;25(10):105037. doi: 10.1016/j.isci.2022.105037 (PMC9485062; doi:10.1016/j.isci.2022.105037), 2022-08-31
Supplement: mmc1.pdf [file mmc1.pdf]

iScience, Volume 25

## **Supplemental information**

### **Cervical transcutaneous spinal stimulation for spinal motor mapping**

**Jeonghoon Oh, Alexander G. Steele, Blesson Varghese, Catherine A. Martin, Michelle S. Scheffler, Rachel L. Markley, Yi-Kai Lo, and Dmitry G. Sayenko**

**Table S1. Participants' demographics; Related to STAR Methods.**

| <b>ID</b> | <b>Gender</b> | <b>Age (year)</b> | <b>Height (cm)</b> | <b>Weight (kg)</b> |
|-----------|---------------|-------------------|--------------------|--------------------|
| S01       | Male          | 47                | 180                | 74                 |
| S02       | Male          | 23                | 173                | 65                 |
| S03       | Female        | 29                | 163                | 69                 |
| S04       | Female        | 26                | 155                | 61                 |
| S05       | Male          | 36                | 176                | 76                 |
| S06       | Female        | 20                | 163                | 84                 |
| S07       | Female        | 18                | 163                | 54                 |
| S08       | Female        | 20                | 160                | 50                 |
| S09       | Male          | 21                | 187                | 90                 |
| S10       | Male          | 37                | 185                | 98                 |
| S11       | Male          | 26                | 170                | 91                 |

**Table S2. Maximum tolerated intensity (mA) of all study participants; Related to STAR Methods.**

| EL#                                           | S01 | S02 | S03 | S04 | S05 | S06 | S07 | S08 | S09 | S10 | S11 |
|-----------------------------------------------|-----|-----|-----|-----|-----|-----|-----|-----|-----|-----|-----|
| <b><u>Rostrocaudal electrodes</u></b>         |     |     |     |     |     |     |     |     |     |     |     |
| EL03                                          | 90  | 120 | 120 | 110 | 95  | 95  | 80  | 70  | 95  | 120 | 125 |
| EL07                                          | 100 | 120 | 120 | 120 | 100 | 95  | 95  | 70  | 100 | 130 | 130 |
| EL11                                          | 100 | 150 | 120 | 130 | 120 | 100 | 95  | 80  | 95  | 130 | 120 |
| EL15                                          | 100 | 150 | 130 | 140 | 120 | 100 | 110 | 90  | 100 | 150 | 120 |
| <b><u>Rostral mediolateral electrodes</u></b> |     |     |     |     |     |     |     |     |     |     |     |
| EL01                                          | 90  | 130 | 110 | 100 | 115 | 95  | 80  | 75  | 135 | 120 | 120 |
| EL02                                          | 80  | 130 | 100 | 120 | 80  | 75  | NA  | 70  | 125 | 120 | 120 |
| EL04                                          | 80  | 130 | 100 | 110 | 100 | 80  | NA  | 70  | 90  | 120 | 110 |
| EL05                                          | 90  | 130 | 110 | 120 | 110 | 90  | 75  | 70  | 130 | 120 | 120 |
| <b><u>Caudal mediolateral electrodes</u></b>  |     |     |     |     |     |     |     |     |     |     |     |
| EL09                                          | 100 | 150 | 120 | 130 | 115 | 100 | 100 | 85  | 120 | 150 | 120 |
| EL10                                          | 100 | 130 | 110 | 130 | 110 | 95  | NA  | 80  | 140 | 140 | 120 |
| EL12                                          | 100 | 140 | 120 | 130 | 120 | 90  | NA  | 70  | 85  | 120 | 110 |
| EL13                                          | 100 | 150 | 120 | 130 | 120 | 100 | 95  | 70  | 120 | 140 | 125 |

EL: electrode; Participant S07 was unable to complete the experiment at EL02, EL04, EL10, and EL12 (indicated as NA)
